# Supplementary material for: High activity nitrogen-doped hollow carbon/silicon hollow spheres as encapsulated Pd–Fe nanoreactors for acetylene dialkoxycarbonylation
Source: Royal Society of Chemistry journal article supplement (doi:10.1039/d4nj01676a), 2024-01-01
Supplement: d4nj01676a1.pdf [file d4nj01676a1.pdf]

## Supporting Information

### **High activity nitrogen-doped hollow carbon/silicon hollow spheres as encapsulated Pd-Fe nanoreactors for acetylene dialkoxycarbonylation**

Fusheng Huang <sup>a</sup>, Yongkang Sun <sup>a</sup>, Jichang Liu <sup>a</sup>, Bin Dai <sup>a,\*</sup>, Jiangbing Li <sup>a,\*</sup>, Xuhong Guo <sup>a,b,\*</sup>

<sup>a</sup> School of Chemistry and Chemical Engineering/State Key Laboratory Incubation Base for Green Processing of Chemical Engineering, Shihezi University, Shihezi 832003, China. E-mail: 20202007061@stu.shzu.edu.cn (Fusheng Huang), 20212307309@stu.shzu.edu.cn (Yongkang Sun), liujc@ecust.edu.cn (Jichang Liu), db\_tea@shzu.edu.cn (Bin Dai), ljbing@126.com (Jiangbing Li), guoxuhong@ecust.edu.cn (Xuhong Guo)

<sup>b</sup> School of Chemical Engineering, East China University of Science and Technology, Shanghai 200237, China. E-mail: guoxuhong@ecust.edu.cn

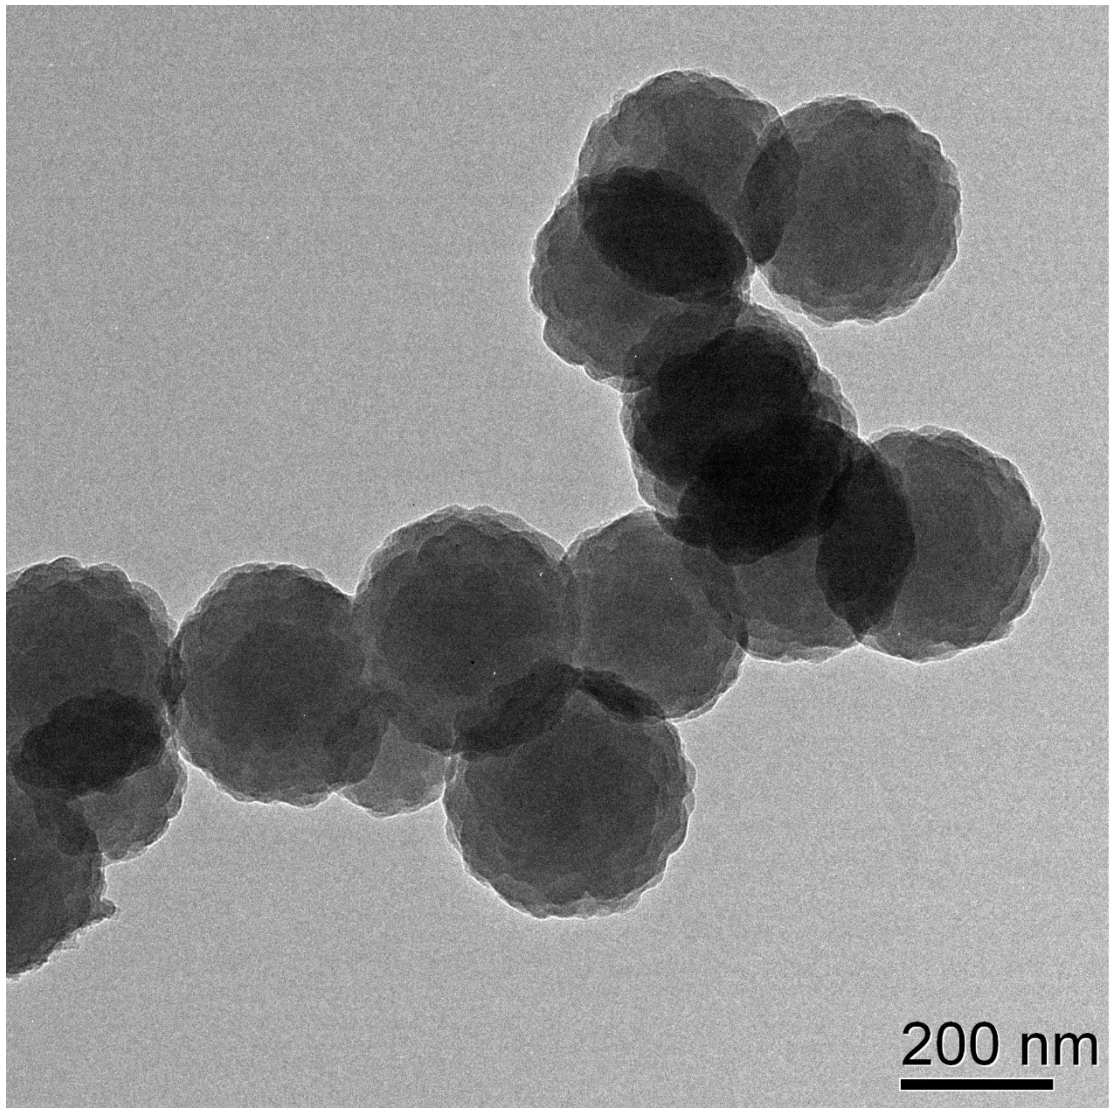

Figure S1 TEM image of PB@mSiO<sub>2</sub>

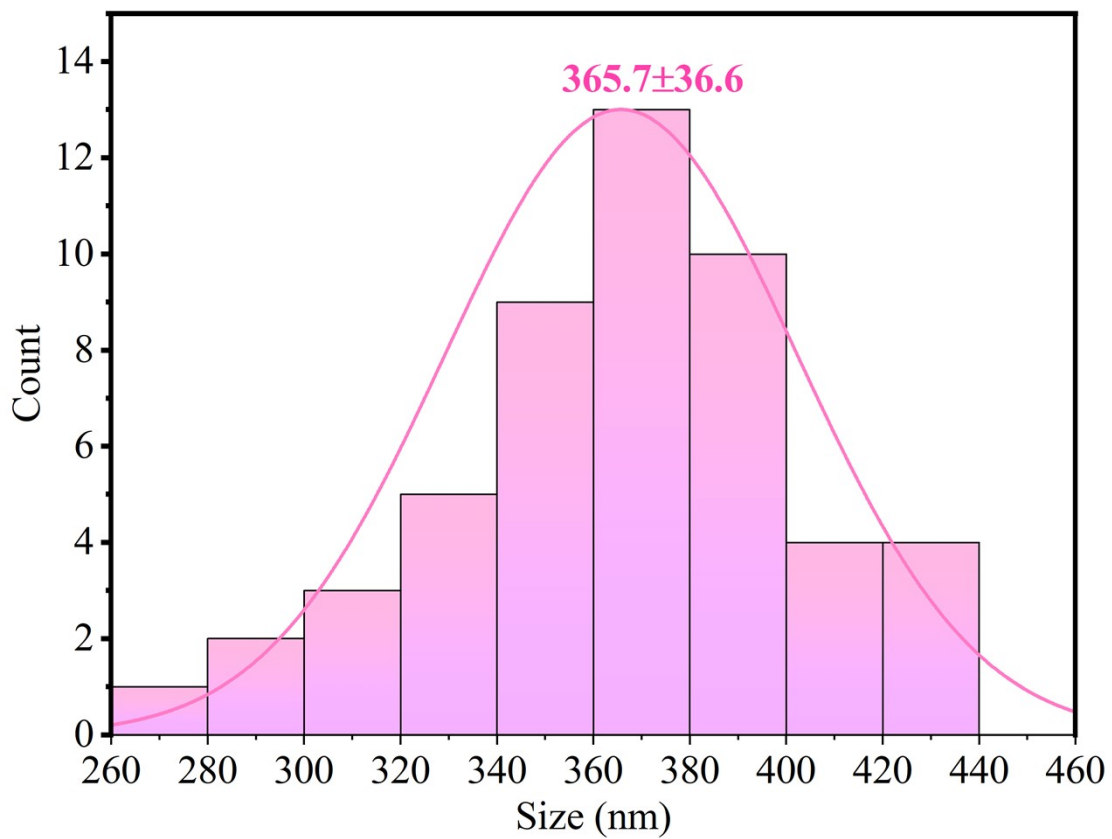

Figure S2. Histogram of particle size of PB@mSiO<sub>2</sub> nanoparticles

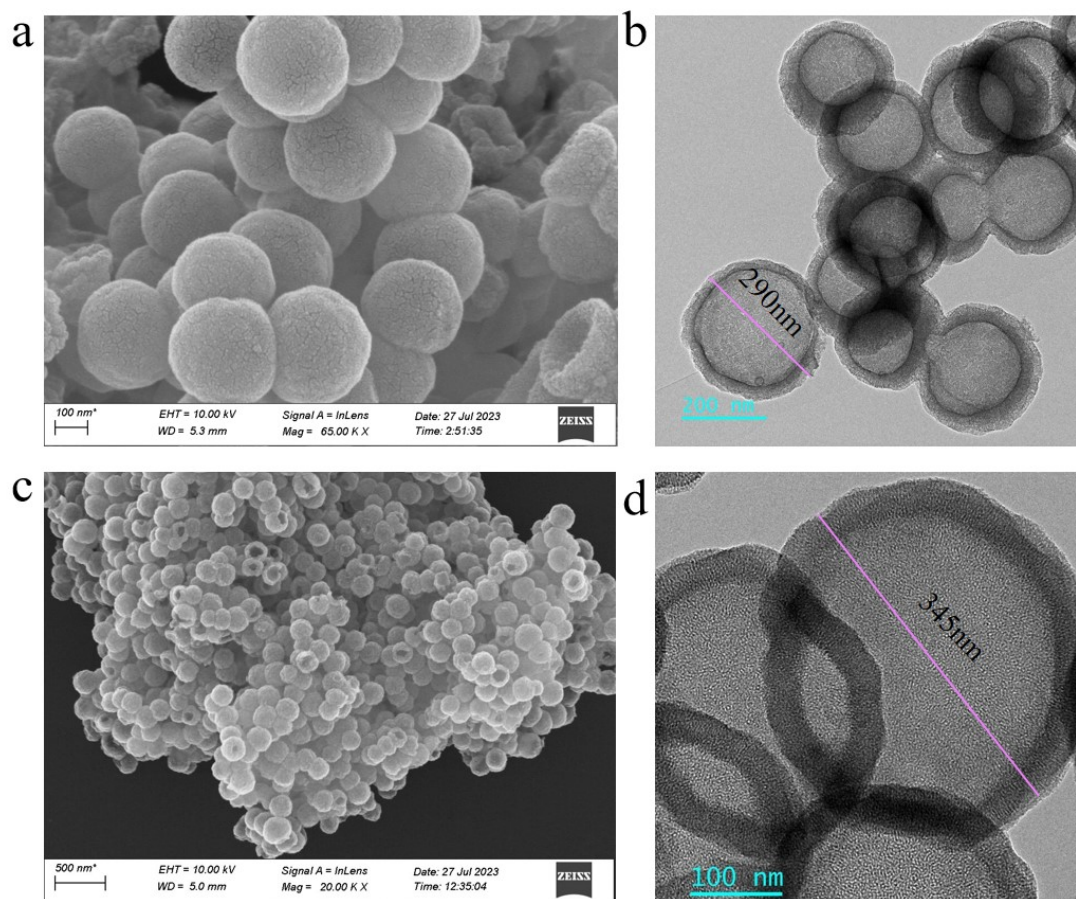

Figure S3. SEM (a) and TEM (b) images of the  $N_xC$  hollow spheres, SEM (c) and TEM (d) images of the  $mSiO_2$  hollow spheres.

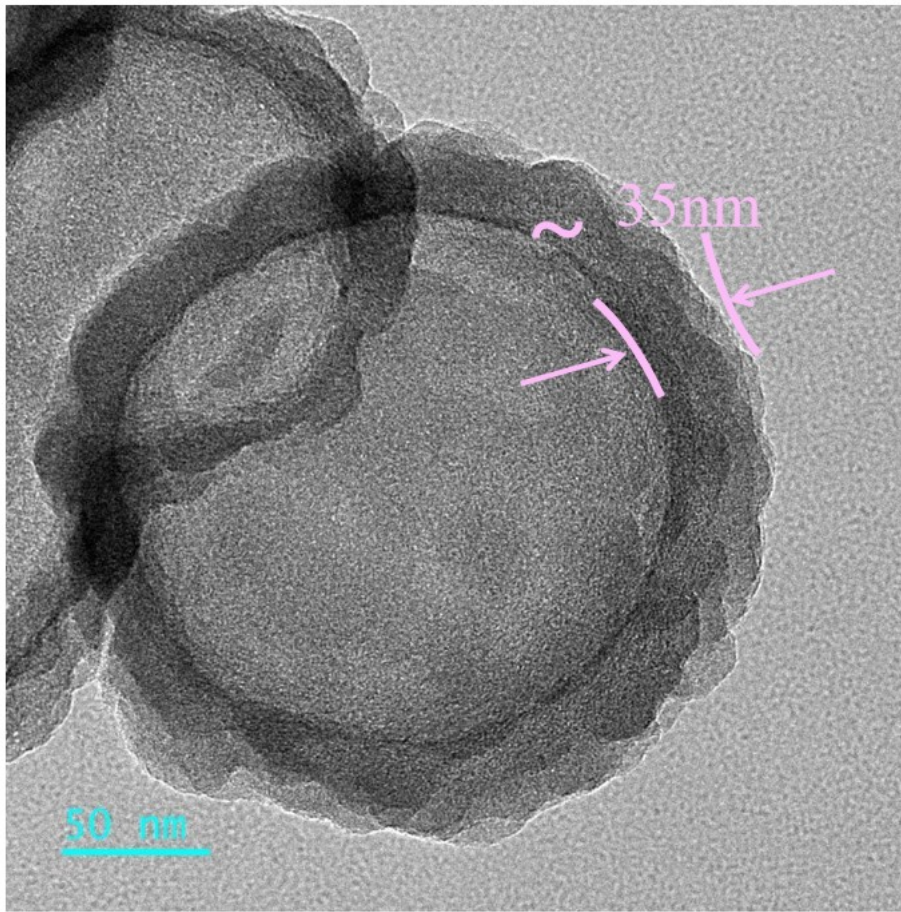

Figure S4. HAADF-STEM image of  $N_xC@mSiO_2$  hollow spheres.

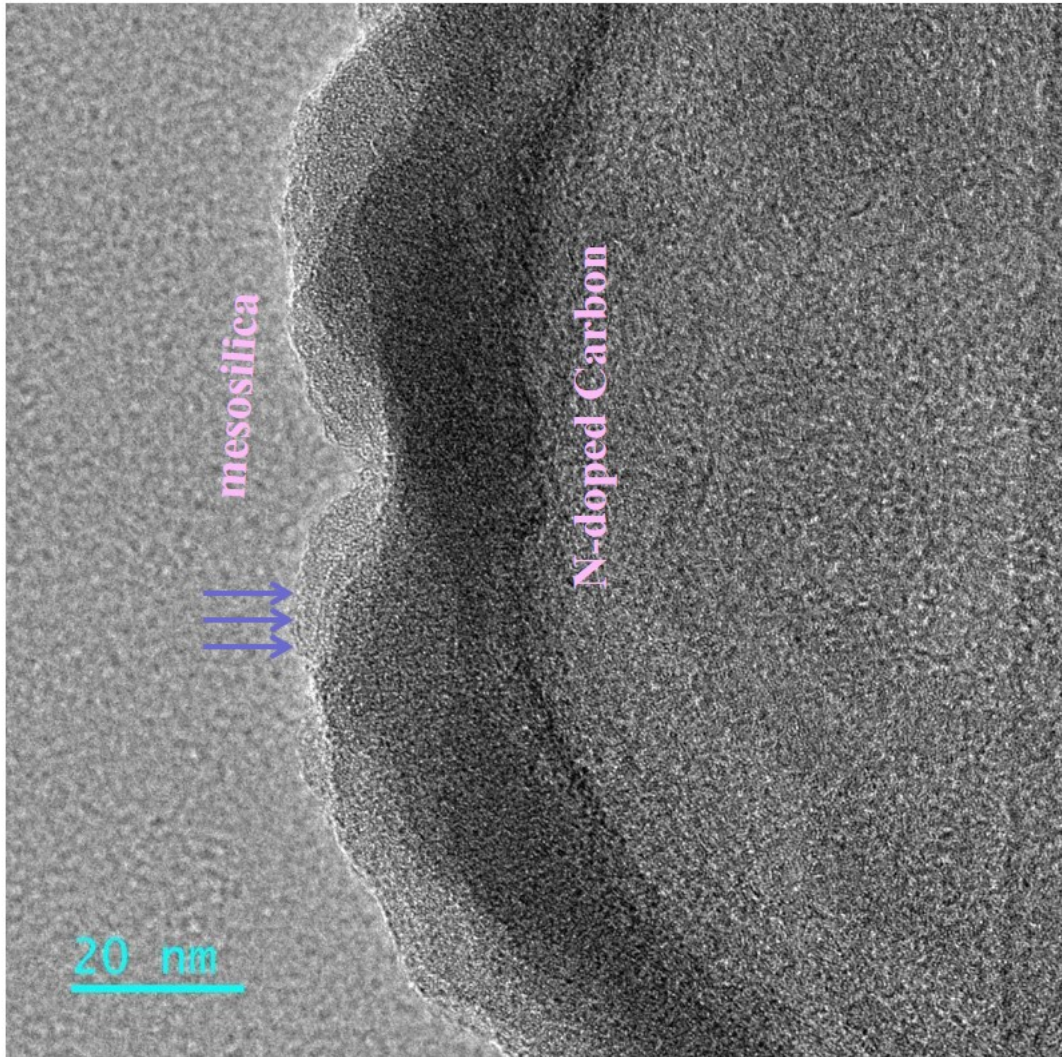

Figure S5. TEM images of  $N_xC@mSiO_2$  hollow spheres.

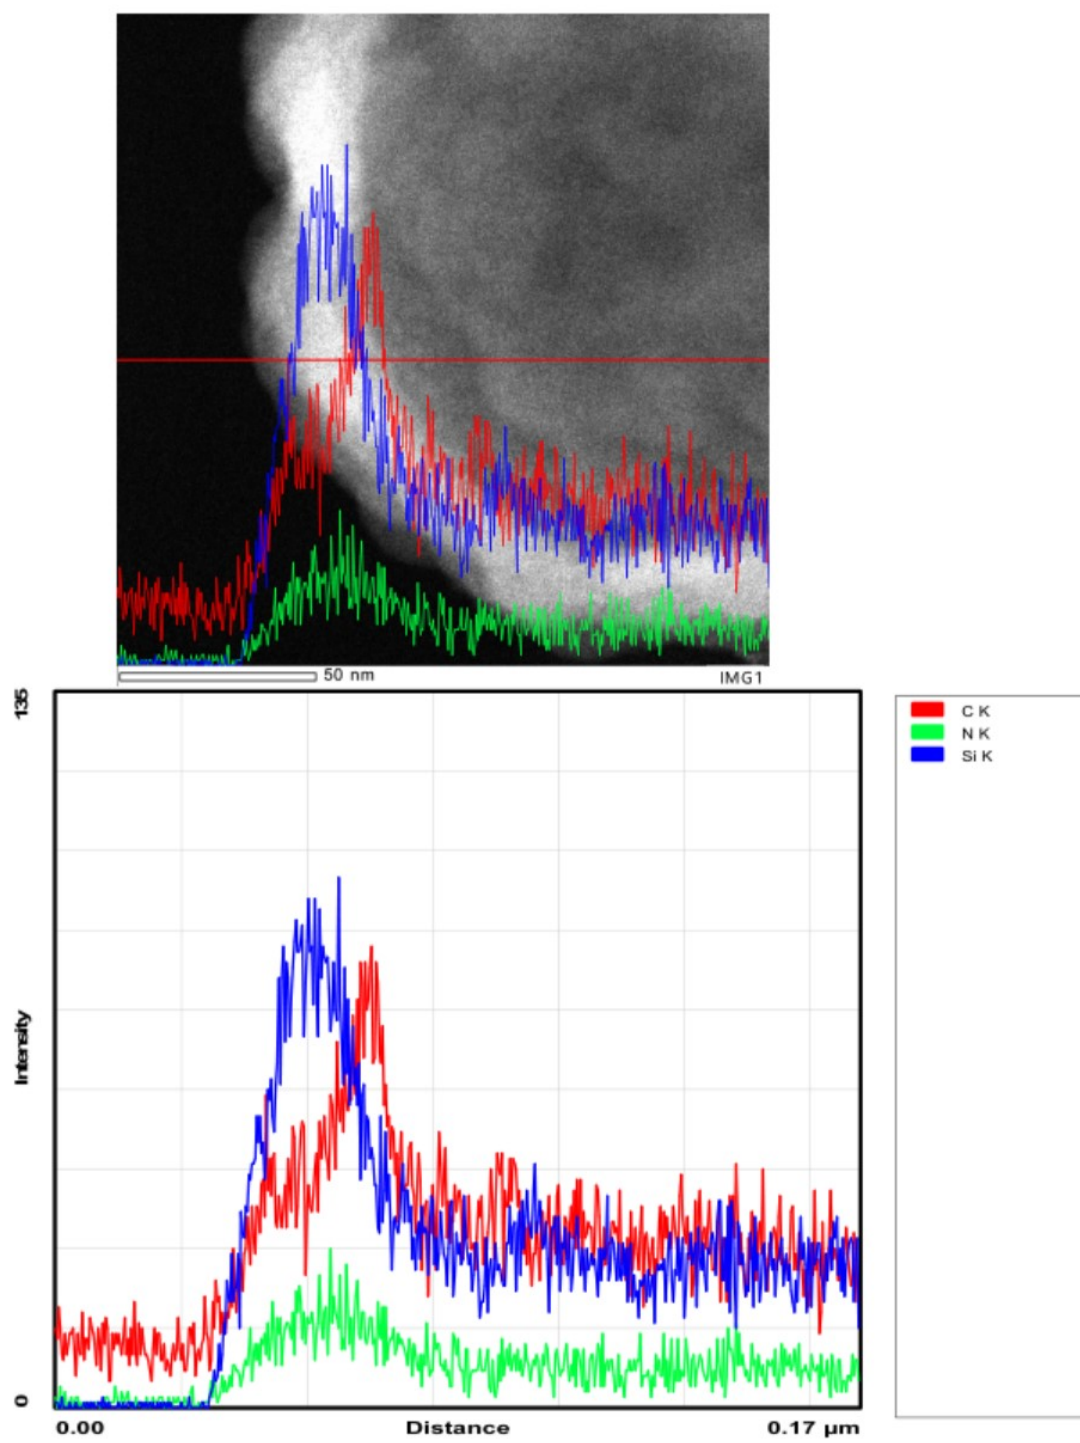

Figure S6. TEM line-scan image of  $N_xC@mSiO_2$  hollow spheres.

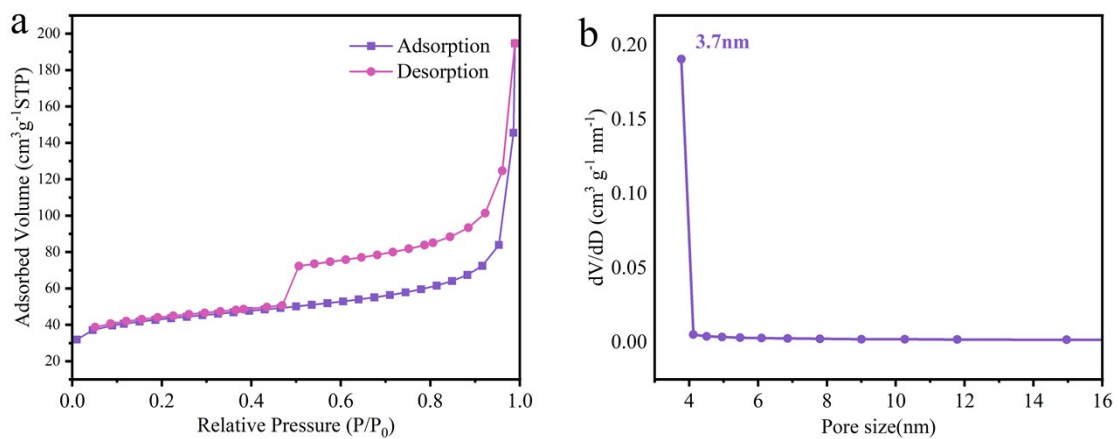

Figure S7. Nitrogen adsorption-desorption isotherm (a) and pore size distribution (b) of the N<sub>x</sub>C@mSiO<sub>2</sub> hollow spheres.



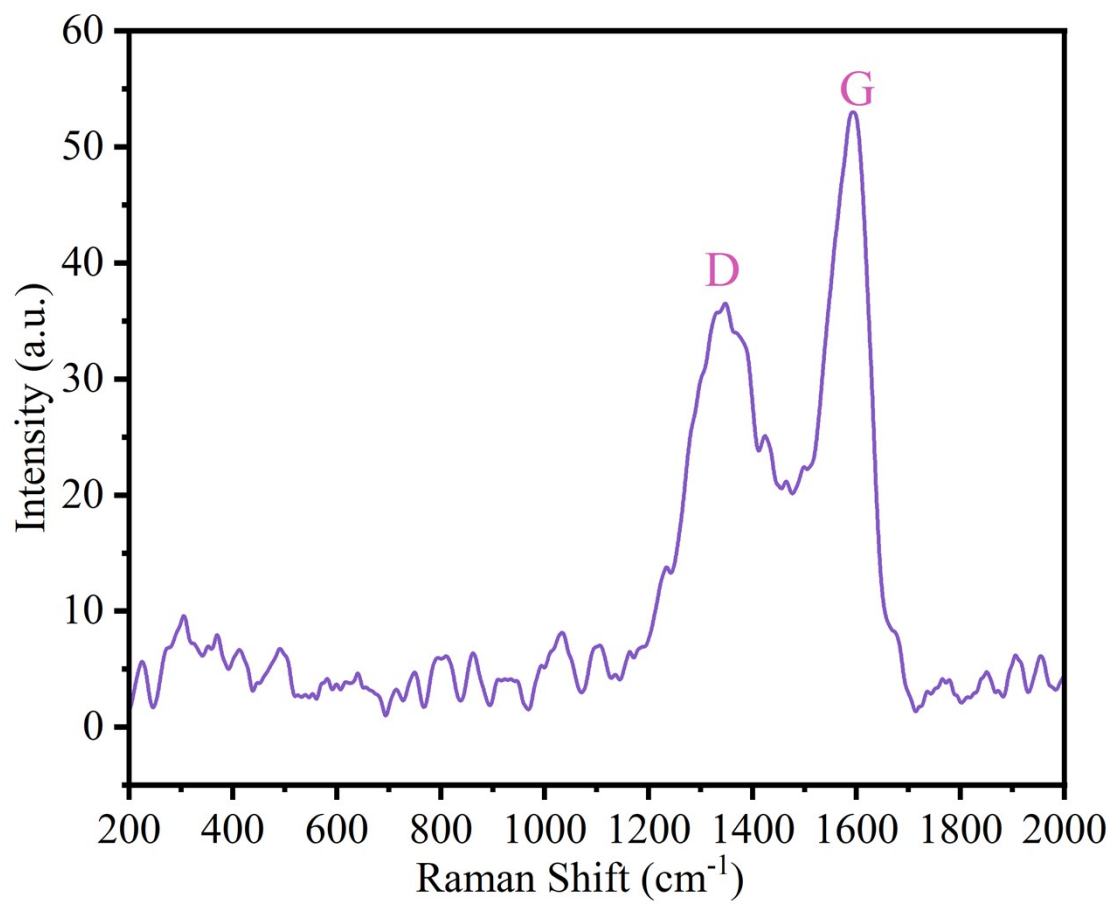

Figure S8. Raman spectrum of  $N_xC@mSiO_2$  hollow spheres.

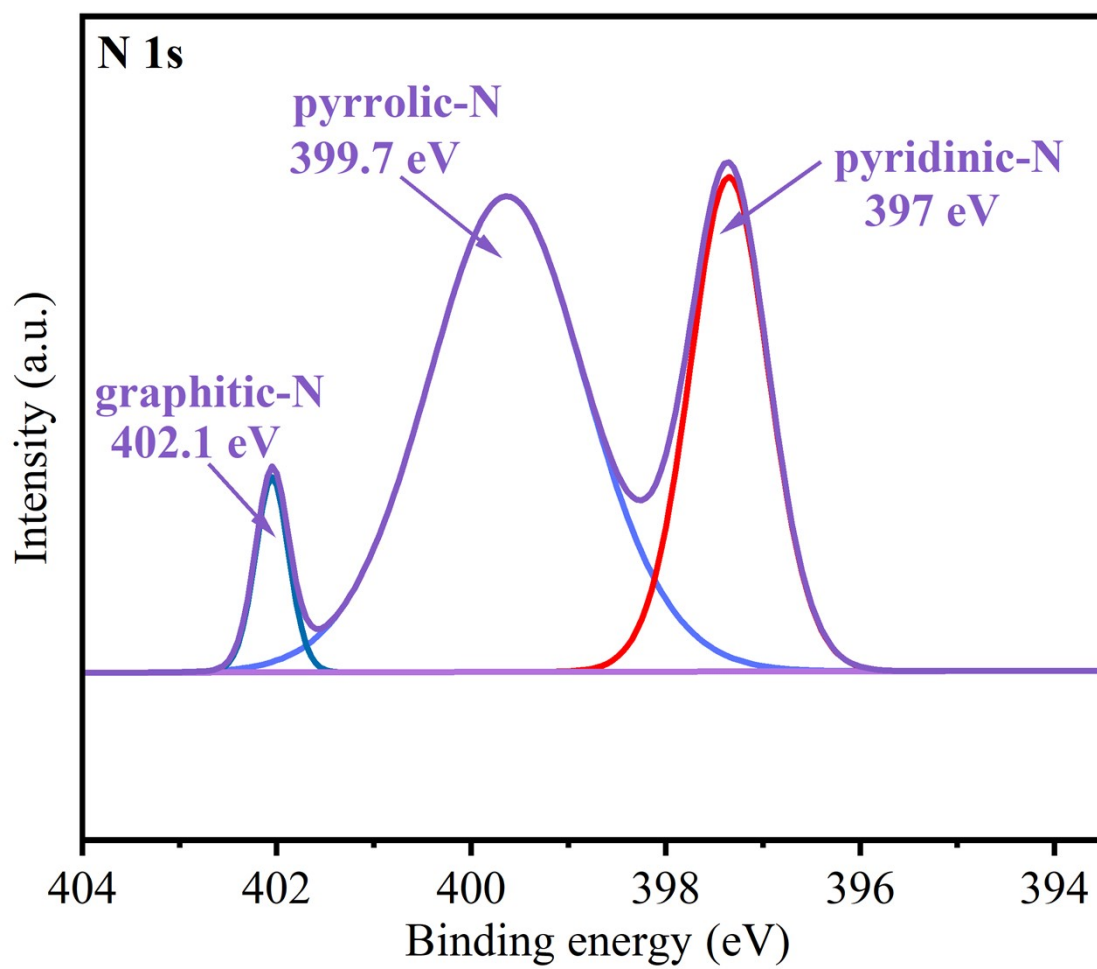

Figure S9. N 1s XPS spectrum of N<sub>x</sub>C@mSiO<sub>2</sub> hollow spheres.

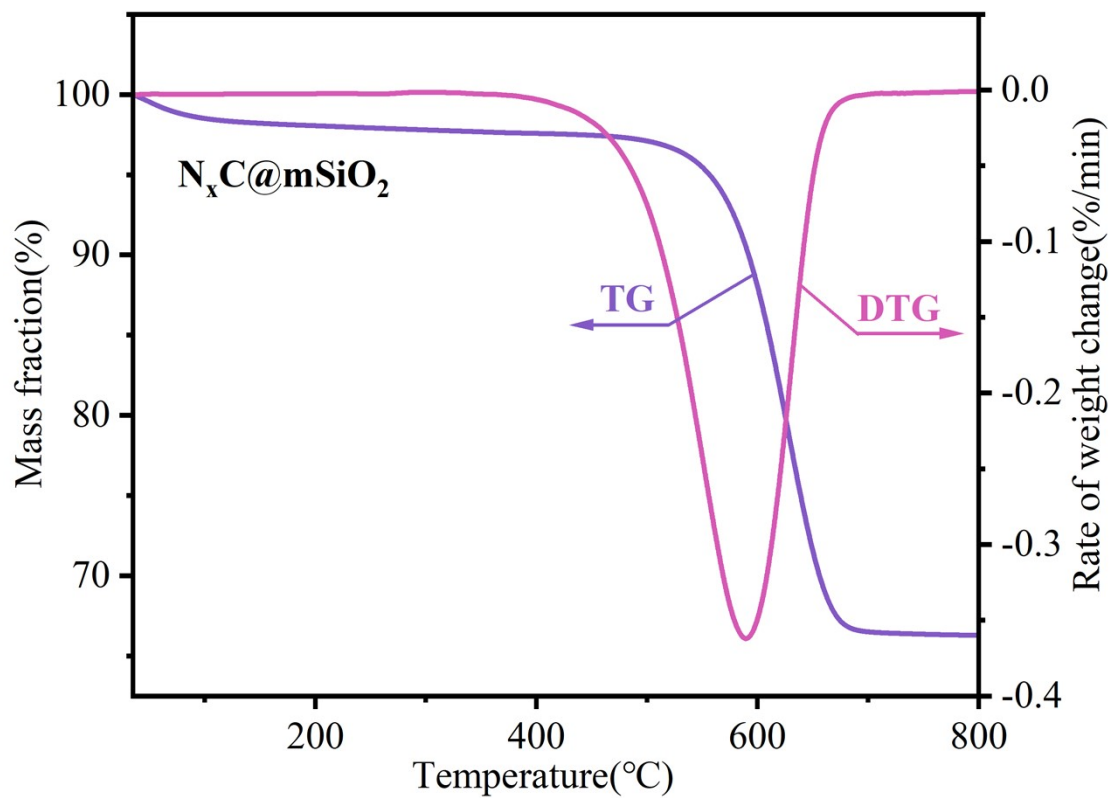

Figure S10. TG and DTG curves of  $N_xC@mSiO_2$  obtained at air atmosphere.

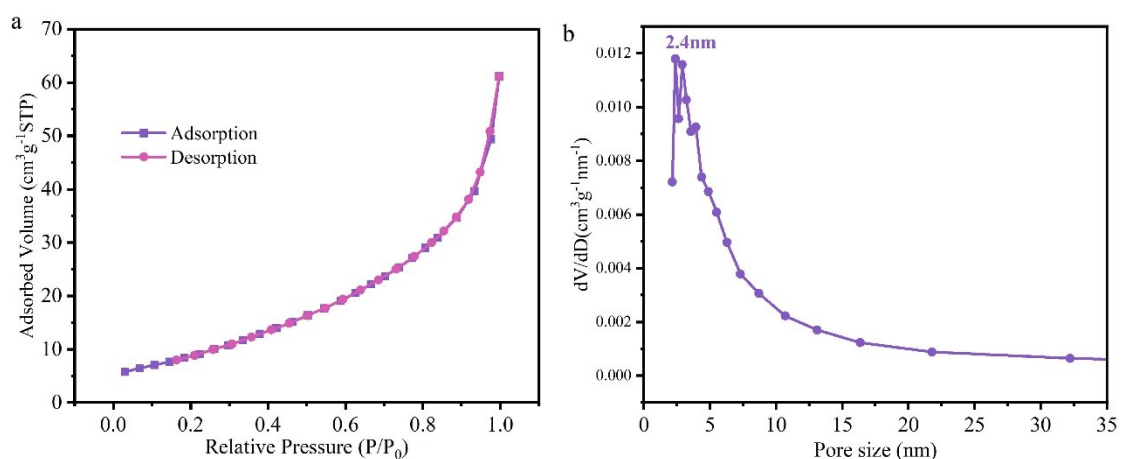

Figure S11. Pd<sub>4</sub>Fe<sub>1</sub>/N<sub>x</sub>C@mSiO<sub>2</sub> Nitrogen adsorption-desorption isotherm and pore size distribution of hollow spheres.

Table S1 The specific surface area and pore structure of the synthesized sample

| Entry | Samples                                                             | S <sub>BET</sub> <sup>a</sup><br>(m <sup>2</sup> /g) | V <sub>t</sub> <sup>b</sup><br>(cm <sup>3</sup> /g) |
|-------|---------------------------------------------------------------------|------------------------------------------------------|-----------------------------------------------------|
| 1     | N <sub>x</sub> C@mSiO <sub>2</sub>                                  | 187                                                  | 0.157                                               |
| 2     | Pd <sub>4</sub> Fe <sub>1</sub> /N <sub>x</sub> C@mSiO <sub>2</sub> | 36                                                   | 0.088                                               |

<sup>a</sup>Specific surface area (S<sub>BET</sub>) was calculated by using the BET method. <sup>b</sup>Total pore volume (V<sub>total</sub>) was obtained at p/p<sub>0</sub> = 0.990.

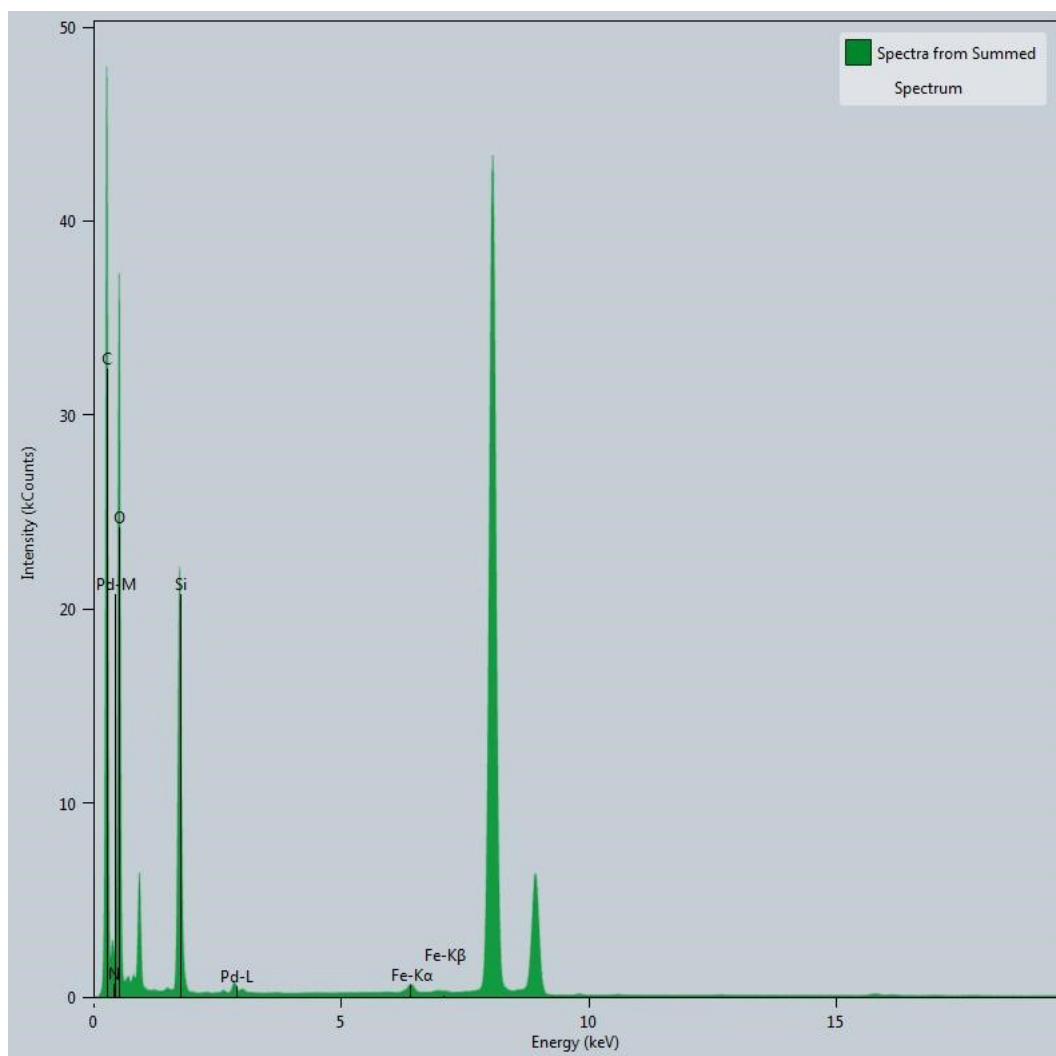

Figure S12. EDX image of catalyst Pd<sub>4</sub>Fe<sub>1</sub>/N<sub>x</sub>C@mSiO<sub>2</sub>

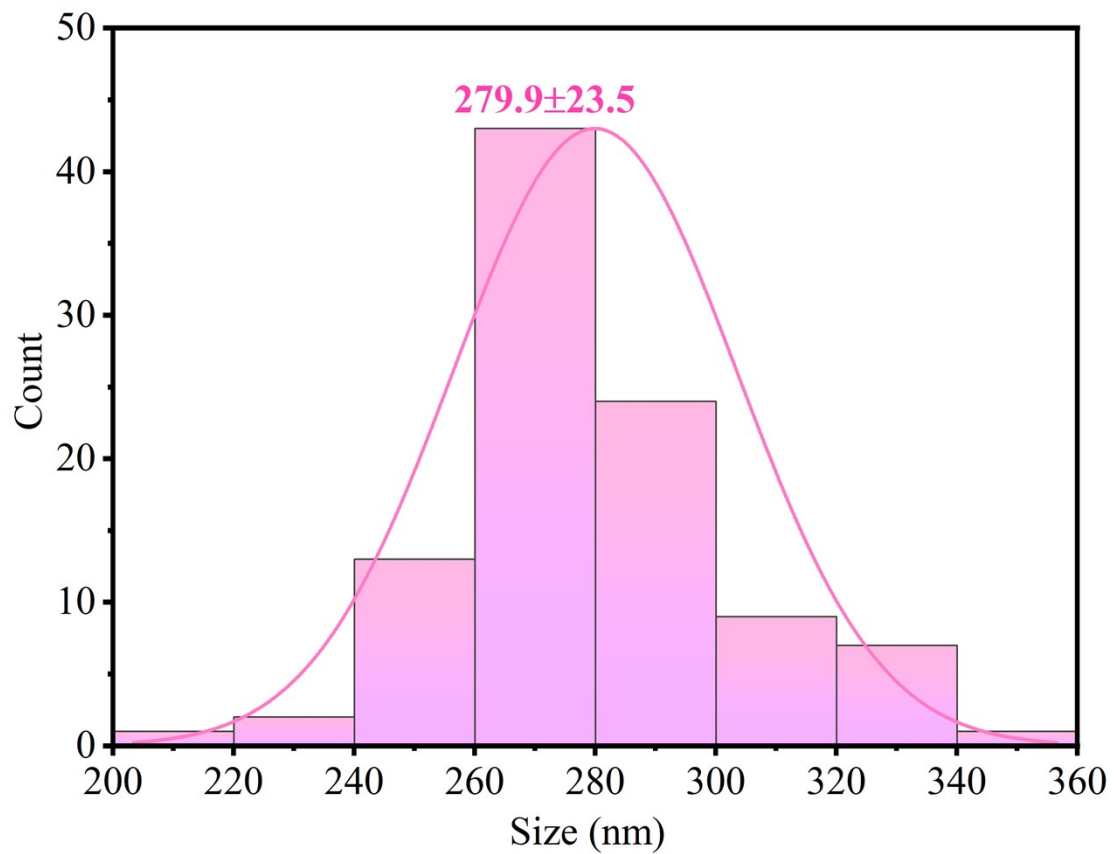

Figure S13. Histogram of particle size of Pd<sub>4</sub>Fe<sub>1</sub>N<sub>x</sub>@mSiO<sub>2</sub> nanoparticles

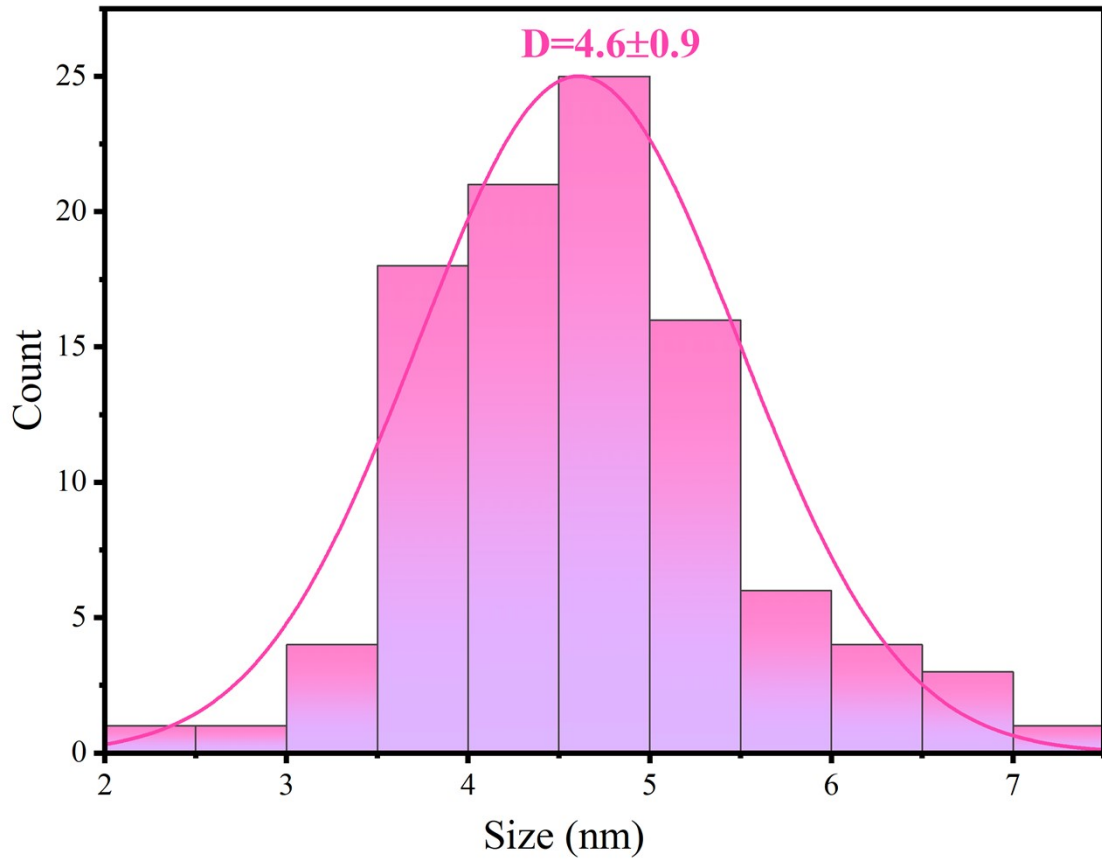

Figure S14. Pd<sub>4</sub>Fe<sub>1</sub>/N<sub>x</sub>C@mSiO<sub>2</sub> Metal particle size distribution histogram of catalyst.

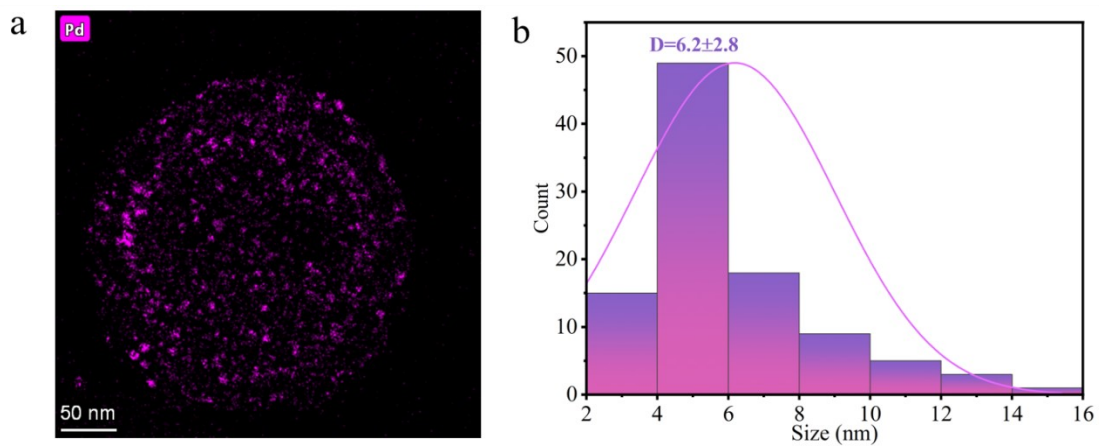

Figure S15.mpping diagram (a) and particle size distribution diagram (b) of catalyst Pd Pd<sub>5</sub>/N<sub>x</sub>C@mSiO<sub>2</sub>



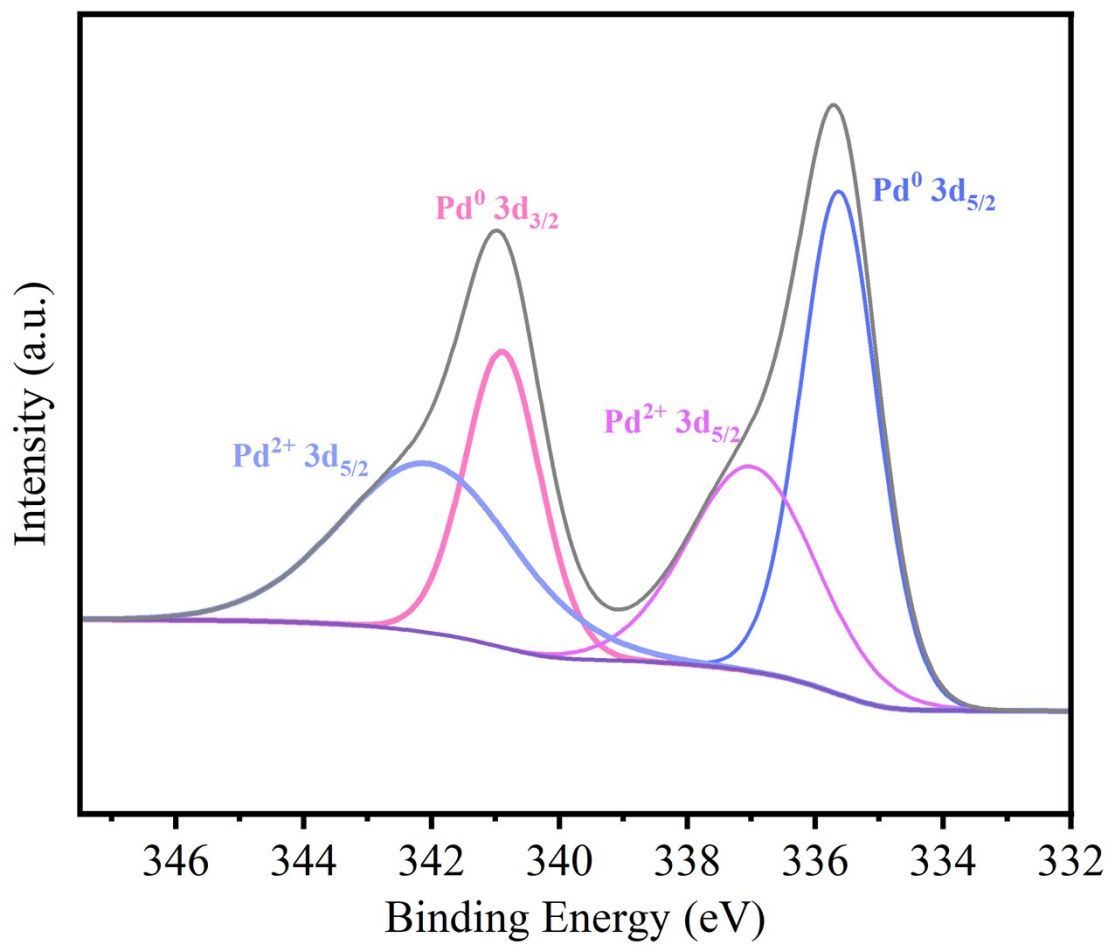

Figure S16. Pd 3d XPS spectrum of Pd<sub>5</sub>/N<sub>x</sub>C@mSiO<sub>2</sub> hollow spheres.

Table S2. XRD comparison of different catalysts

| Sample                                                                | Pd     | Fe     |
|-----------------------------------------------------------------------|--------|--------|
|                                                                       | atom % | atom % |
| Pd <sub>4</sub> Fe <sub>0.5</sub> /N <sub>x</sub> C@mSiO <sub>2</sub> | 84.2   | 15.8   |
| Pd <sub>4</sub> Fe <sub>1</sub> /N <sub>x</sub> C@mSiO <sub>2</sub>   | 68.7   | 31.3   |
| Pd <sub>4</sub> Fe <sub>2</sub> N <sub>x</sub> C@mSiO <sub>2</sub>    | 62.3   | 37.7   |
| Pd <sub>4</sub> Fe <sub>3</sub> /N <sub>x</sub> C@mSiO <sub>2</sub>   | 56.6   | 43.4   |

Table S3. XPS comparison of different catalysts

| Sample                                                                | Pd     | Fe     |
|-----------------------------------------------------------------------|--------|--------|
|                                                                       | atom % | atom % |
| Pd <sub>4</sub> Fe <sub>0.5</sub> /N <sub>x</sub> C@mSiO <sub>2</sub> | 84.7   | 15.3   |
| Pd <sub>4</sub> Fe <sub>1</sub> /N <sub>x</sub> C@mSiO <sub>2</sub>   | 68.6   | 31.4   |
| Pd <sub>4</sub> Fe <sub>2</sub> N <sub>x</sub> C@mSiO <sub>2</sub>    | 61.3   | 38.7   |
| Pd <sub>4</sub> Fe <sub>3</sub> /N <sub>x</sub> C@mSiO <sub>2</sub>   | 51.3   | 48.7   |

Table S4. Surface state of the catalysts from XPS

| sample                                                                | Pd <sup>0</sup>   |                   | Pd <sup>2+</sup>  |                   | Fe <sup>2+</sup>  |                   |
|-----------------------------------------------------------------------|-------------------|-------------------|-------------------|-------------------|-------------------|-------------------|
|                                                                       | 3d <sub>5/2</sub> | 3d <sub>3/2</sub> | 3d <sub>5/2</sub> | 3d <sub>3/2</sub> | 2p <sub>3/2</sub> | 2p <sub>1/2</sub> |
| Pd <sub>5</sub> /N <sub>x</sub> C@mSiO <sub>2</sub>                   | 335.6             | 340.9             | 337               | 342               | -                 | -                 |
| Pd <sub>4</sub> Fe <sub>0.5</sub> /N <sub>x</sub> C@mSiO <sub>2</sub> | 335.81            | 341.11            | 337.24            | 342.5             | 710.17            | 722.74            |
| Pd <sub>4</sub> Fe <sub>1</sub> /N <sub>x</sub> C@mSiO <sub>2</sub>   | 335.95            | 341.23            | 337.4             | 342.96            | 709.83            | 722.81            |
| Pd <sub>4</sub> Fe <sub>2</sub> /N <sub>x</sub> C@mSiO <sub>2</sub>   | 336.04            | 341.35            | 337.27            | 342.55            | 710.02            | 723.18            |
| Pd <sub>4</sub> Fe <sub>3</sub> /N <sub>x</sub> C@mSiO <sub>2</sub>   | 336.11            | 341.38            | 337.19            | 342.37            | 710.12            | 723.12            |

Table S5. Element proportions corresponding to XPS peaks of different catalysts

| Sample                                                                | Pd <sup>0</sup> | Pd <sup>2+</sup> | Fe <sup>3+</sup> | Fe <sup>2+</sup> |
|-----------------------------------------------------------------------|-----------------|------------------|------------------|------------------|
|                                                                       | atom %          | atom %           | atom %           | atom %           |
| Pd <sub>4</sub> Fe <sub>0.5</sub> /N <sub>x</sub> C@mSiO <sub>2</sub> | 72.42           | 27.58            | 67.35            | 32.65            |
| Pd <sub>4</sub> Fe <sub>1</sub> /N <sub>x</sub> C@mSiO <sub>2</sub>   | 73.3            | 26.7             | 65.4             | 34.6             |
| Pd <sub>4</sub> Fe <sub>2</sub> N <sub>x</sub> C@mSiO <sub>2</sub>    | 68.62           | 31.38            | 76.82            | 23.18            |
| Pd <sub>4</sub> Fe <sub>3</sub> /N <sub>x</sub> C@mSiO <sub>2</sub>   | 65.46           | 34.54            | 73.18            | 26.82            |

Table S6. Comparison of catalytic properties of catalysts prepared with different carriers for acetylene dialkoxycarbonylation.

| Catalyst                                           | Conv. (%) | Sel. (%) |      |         |
|----------------------------------------------------|-----------|----------|------|---------|
|                                                    |           | EA       | DESu | DMM+DMF |
| Pd <sub>4</sub> Fe <sub>1</sub> /N <sub>x</sub> C  | 86.1      | ---      | ---  | 80.4    |
| Pd <sub>4</sub> Fe <sub>1</sub> /C                 | 82.7      | ---      | ---  | 76.4    |
| Pd <sub>4</sub> Fe <sub>1</sub> /mSiO <sub>2</sub> | 75.6      | ---      | ---  | 52.1    |

Reaction conditions: catalyst 0.05 g, acetylene (11 mmol), CH<sub>3</sub>OH (20 mL), P<sub>CO</sub> = 3.4 MPa, P<sub>air</sub> = 1.6 MPa, 343K. The Conv.% is the acetylene conversion and the Sel.% is the selectivity of alkyne dialkoxycarbonylation, including DESu, DEM and DEF. EA, DESu, DEM, DEF denote ethyl acrylate, diethyl succinate, diethyl maleate (Z) and diethyl fumarate (E), respectively.

Table S7. Reaction time effect on the catalytic activity of Pd<sub>4</sub>Fe<sub>1</sub>/N<sub>x</sub>C@mSiO<sub>2</sub> catalyst for acetylene dialkoxycarbonylation.

| T (h) | Conv. (%) | Sel. (%) |      |         |
|-------|-----------|----------|------|---------|
|       |           | EA       | DESu | DMM+DMF |
| 1     | 75.6      | ---      | ---  | 53.4    |
| 2     | 80.8      | ---      | ---  | 72.8    |
| 3     | 85.8      | ---      | ---  | 80.7    |
| 4     | 88.4      | ---      | ---  | 83.5    |
| 5     | 90.6      | ---      | ---  | 85.6    |

Reaction conditions: catalyst (0.05 g Pd<sub>4</sub>Fe<sub>1</sub>/N<sub>x</sub>C@mSiO<sub>2</sub>), acetylene (11 mmol), CH<sub>3</sub>OH (20 mL), P<sub>CO</sub> = 3.4 MPa, P<sub>air</sub> = 1.6 MPa, 343K. The Conv.% is the acetylene conversion and the Sel.% is the selectivity of alkyne dialkoxycarbonylation, including DESu, DEM and DEF. EA, DESu, DEM, DEF denote ethyl acrylate, diethyl succinate, diethyl maleate (Z) and diethyl fumarate (E), respectively.

Table S8. Temperature effect on the catalytic activity of Pd<sub>4</sub>Fe<sub>1</sub>/N<sub>x</sub>C@mSiO<sub>2</sub> catalyst for acetylene dialkoxycarbonylation.

| T (k) | Conv. (%) | Sel. (%) |      |         |
|-------|-----------|----------|------|---------|
|       |           | EA       | DESu | DMM+DMF |
| 313   | 65.4      |          |      | 60.6    |
| 323   | 77.8      | ---      | ---  | 72.1    |
| 333   | 83.6      | ---      | ---  | 78.6    |
| 343   | 90.2      | ---      | ---  | 85.4    |
| 353   | 91.4      |          |      | 86.2    |

Reaction conditions: catalyst (0.05 g Pd<sub>4</sub>Fe<sub>1</sub>/N<sub>x</sub>C@mSiO<sub>2</sub>), acetylene (11 mmol), CH<sub>3</sub>OH (20 mL), P<sub>CO</sub> = 3.4 MPa, P<sub>air</sub> = 1.6 MPa, 5.0 h. The Conv.% is the acetylene conversion and the Sel.% is the selectivity of alkyne dialkoxycarbonylation, including DESu, DEM and DEF. EA, DESu, DEM, DEF denote ethyl acrylate, diethyl succinate, diethyl maleate (Z) and diethyl fumarate (E), respectively.

Table S9. ICP test is used for Pd and Fe content in acetylene dialkoxycarbonylation  $\text{Pd}_4\text{Fe}_1/\text{N}_x\text{C@mSiO}_2$ .

| Samples                                                  | Pd loading | Fe loading |
|----------------------------------------------------------|------------|------------|
| Fresh $\text{Pd}_4\text{Fe}_1/\text{N}_x\text{C@mSiO}_2$ | 3.67       | 0.78       |
| Spent $\text{Pd}_4\text{Fe}_1/\text{N}_x\text{C@mSiO}_2$ | 3.32       | 0.64       |

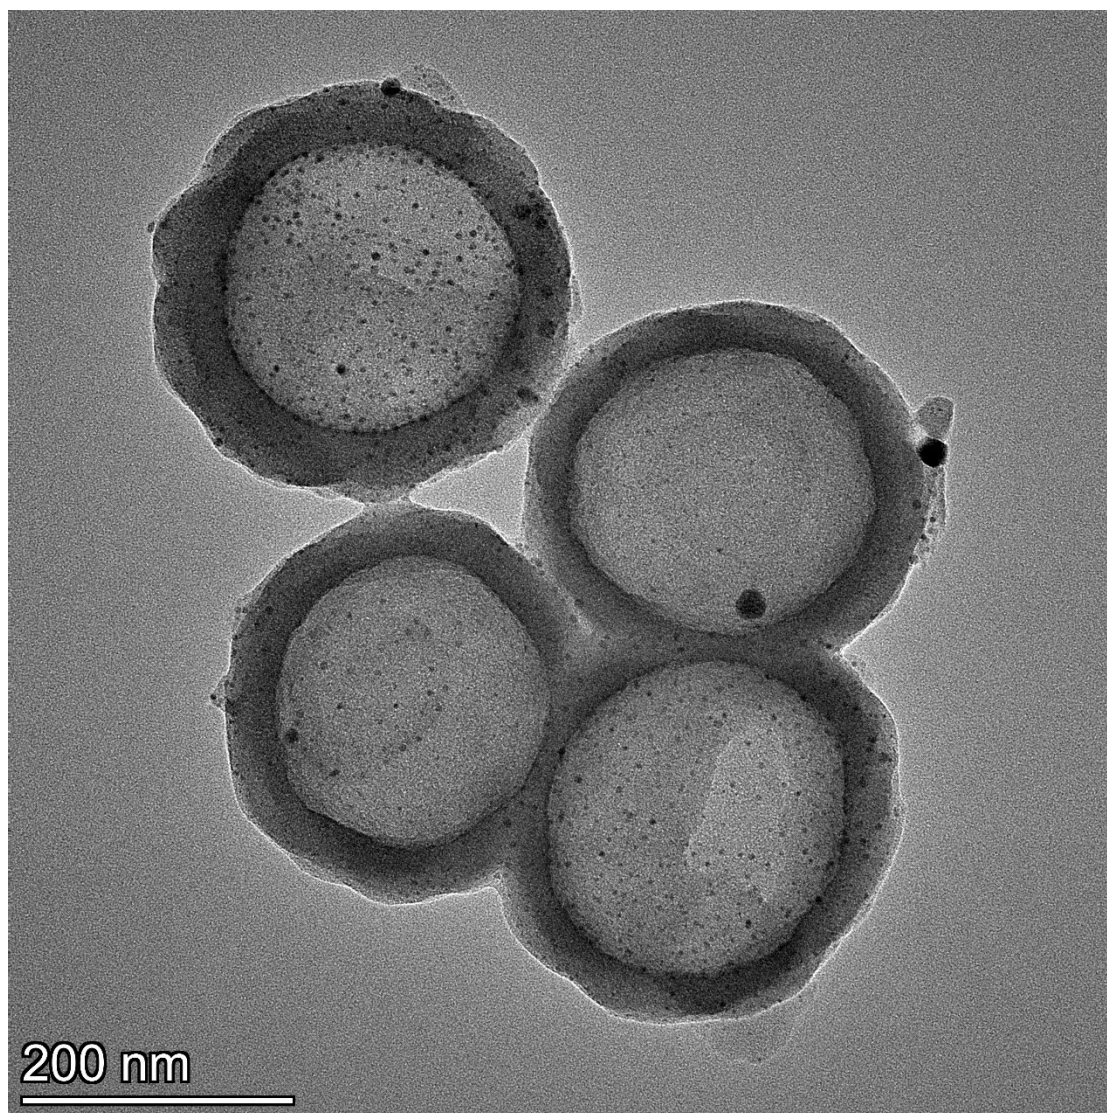

Figure S17.  $\text{Pd}_4\text{Fe}_1/\text{N}_x\text{C@mSiO}_2$  TEM with five cycles

Table S7. Comparison of catalytic performance among different catalysts in acetylene dialkoxyacylation

| entry | Catalyst                                                                         | Conv.(%) | Sel.(%) |      |         | reference        |
|-------|----------------------------------------------------------------------------------|----------|---------|------|---------|------------------|
|       |                                                                                  |          | MA      | DMSu | DMM+DMF |                  |
| 1     | <sup>a</sup> Pd <sub>4</sub> Fe <sub>1</sub> /N <sub>x</sub> C@mSiO <sub>2</sub> | 90.2     | -       | -    | 85.4    | <b>This work</b> |
| 2     | <sup>a</sup> Pd/N <sub>x</sub> C@mSiO <sub>2</sub>                               | 90       | -       | -    | 85      | 1                |
| 3     | <sup>a</sup> Pd/N <sub>x</sub> C                                                 | 85.1     | -       | -    | 78.4    | 1                |
| 4     | <sup>a</sup> Pd/mSiO <sub>2</sub>                                                | 75.3     | -       | -    | 55.7    | 1                |
| 5     | <sup>a</sup> Pd/MCM-41                                                           | 65.1     | -       | -    | 45.61   | 1                |
| 6     | <sup>a</sup> Pd/C@mSiO <sub>2</sub>                                              | 78.9     | -       | -    | 70.49   | 1                |
| 7     | <sup>b</sup> Pd <sub>1</sub> /PIP <sub>s</sub>                                   | 53.3     | 0       | 6.3  | 93.7    | 2                |
| 8     | <sup>b</sup> Pd/NaY                                                              | 0        | 0       | 0    | 0       | 2                |
| 9     | <sup>b</sup> Pd/AC                                                               | 0        | 0       | 0    | 0       | 2                |
| 10    | <sup>c</sup> Pd/g-C <sub>3</sub> N <sub>4</sub>                                  | trace    | 0       | 0    | 0       | 3                |
| 11    | <sup>c</sup> Pd/SiO <sub>2</sub>                                                 | 12.6     | 0       | -    | 49.4    | 3                |
| 12    | <sup>c</sup> Pd/CeO <sub>2</sub>                                                 | 8.0      | 0       | -    | 100     | 3                |
| 13    | <sup>c</sup> Pd/Al <sub>2</sub> O <sub>3</sub>                                   | 10.2     | 0       | -    | 100     | 3                |
| 14    | <sup>c</sup> Pd/AC                                                               | 21.9     | 0       | -    | 100     | 3                |
| 15    | <sup>c</sup> Pd/AC(nanosheet)                                                    | 43.8     | 0       | -    | 100     | 3                |
| 16    | <sup>d</sup> Pd/Fe <sub>2</sub> O <sub>3</sub> +KI                               | 80       | 0       | -    | 78      | 4                |
| 17    | <sup>e</sup> Homo.Pd+Cu                                                          | 86       | -       | -    | 100     | 5                |

Reaction conditions: <sup>a</sup>catalyst (0.05 g, 4 wt.% Pd, 1 wt.% Fe), acetylene (11.0 mmol), CH<sub>3</sub>OH (20 mL), P<sub>CO</sub> = 3.4 MPa, P<sub>air</sub> = 1.6 MPa, 343K, 5.0 h. <sup>b</sup>Reference.<sup>1</sup> Catalyst (0.3 g Pd/PIPs, 1 wt % Pd; 0.3 g Pd/ NaY, 1 wt % Pd; 0.3 g Pd/AC, 1 wt % Pd), acetylene (9.0 mmol), CH<sub>3</sub>OH (10.0 g), P<sub>d</sub> = 2.2 MPa, P<sub>air</sub> = 3.0 MPa, 373 K, 3.0 h). <sup>c</sup>Reference.<sup>2</sup> T = 353 K; 0.05 g catalyst; P<sub>CO</sub> = 4.55 MPa; P<sub>O<sub>2</sub></sub> = 0.45 MPa; t = 10h. <sup>d</sup>Reference.<sup>3</sup> T = 353 K, 0.05 g catalyst, 10 mmol of C<sub>2</sub>H<sub>2</sub>, O<sub>2</sub> + CO (1:10, 5MPa), and KI as a promoter for 5 h. <sup>e</sup>Reference.<sup>4</sup> Conv. (%) is the conversion of acetylene, MA denotes methyl acrylate, and sel. (%) is 1,4dicarboxylic acid esters including DMSu, DMM, and DMF.

**Reference :**

- [1] Huang F, Sun Y, Liu J, et al. Nitrogen-oxygen co-doped carbon@silica hollow spheres as encapsulated Pd nanoreactors for acetylene dialkoxycarbonylation[J]. *Journal of Colloid and Interface Science* 662 (2024) 479-489.
- [2] X. Li, S. Feng, P. Hemberger, A. Bodi, X. Song, Q. Yuan, J. Mu, B. Li, Z. Jiang, Y. Ding, Iodide-Coordinated Single-Site Pd Catalysts for Alkyne Dialkoxycarbonylation, *ACS Catalysis* 11 (2021) 9242-9251.
- [3] X. Wei, Z. Ma, J. Lu, X. Mu, B. Hu, The highly efficient and selective dicarbonylation of acetylene catalysed by palladium nanosheets supported on activated carbon, *New Journal of Chemistry* 44 (2020) 11835-11840.
- [4] X. Wei, Z. Ma, J. Lu, X. Mu, B. Hu, Strong metal-support interactions between palladium nanoclusters and hematite toward enhanced acetylene dicarbonylation at low temperature, *New Journal of Chemistry* 44 (2020) 1221-1227.
- [5] C. Yang, K. Li, J. Wang, S. Zhou, Selective hydrogenation of phenol to cyclohexanone over Pd nanoparticles encaged hollow mesoporous silica catalytic nanoreactors, *Applied Catalysis A: General* 610 (2021) 117961.
